# Supplementary material for: Making and Breaking—Insight into the Symmetry of Salen Analogues
Source: MDPI journal article supplement (doi:10.3390/sym15020424), 2023-02-05
Supplement: s1 [file s1]

## Supplementary Material

### Making and Breaking - Insight Into the Symmetry of Salen Analogues

*Katarzyna M. Krupka<sup>1</sup>, Sylwia Banach<sup>1</sup>, Michał Pocheć<sup>1</sup>, Jarosław J. Panek<sup>1</sup> and Aneta Jezierska<sup>1\*</sup>*

<sup>1</sup>Faculty of Chemistry, University of Wrocław, ul. F. Joliot-Curie 14, 50-383 Wrocław, Poland

Correspondence should be addressed to: aneta.jezierska@chem.uni.wroc.pl.

#### Table of contents:

- I.** Figure S1. Examples of two-dimensional (2D) Hirshfeld (fingerprint) diagrams of various intermolecular interactions in the crystal structure for the meta compound.
- II.** Figure S2. Examples of two-dimensional (2D) Hirshfeld (fingerprint) diagrams of various intermolecular interactions in the crystal structure for the para compound.
- III.** Figure S3. Combined QTAIM and NCI results for all of the studied Schiff bases in PCM.
- IV.** Figure S4. NCI scatter graphs for all of the compounds in PCM.
- V.** Table S1. QTAIM Bond Critical Points (BCPs) properties for hydrogen bond in all of the compounds in PCM.
- VI.** Figure S5. ELF for the intramolecular hydrogen bond in the ortho compound in vacuo and in PCM.
- VII.** Figure S6. ELF for the intramolecular hydrogen bond in the meta compound in vacuo and in PCM.
- VIII.** Figure S7. ELF for the intramolecular hydrogen bond in the para compound in vacuo and in PCM.
- IX.** Table S2. Core-valence bifurcation point values and CVB indexes for all of the compounds in PCM.

**Figure S1.** Examples of two-dimensional (2D) Hirshfeld (fingerprint) diagrams of various intermolecular interactions in the crystal structure for the meta compound.

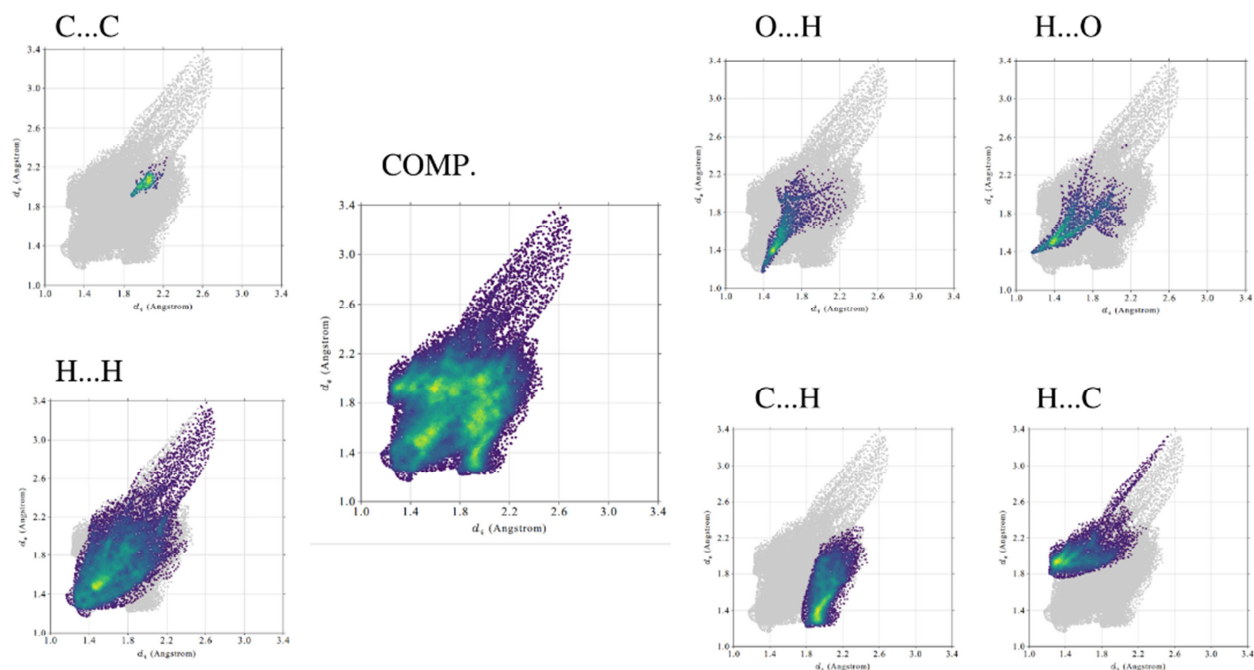

**Figure S2.** Examples of two-dimensional (2D) Hirshfeld (fingerprint) diagrams of various intermolecular interactions in the crystal structure for the ortho compound.

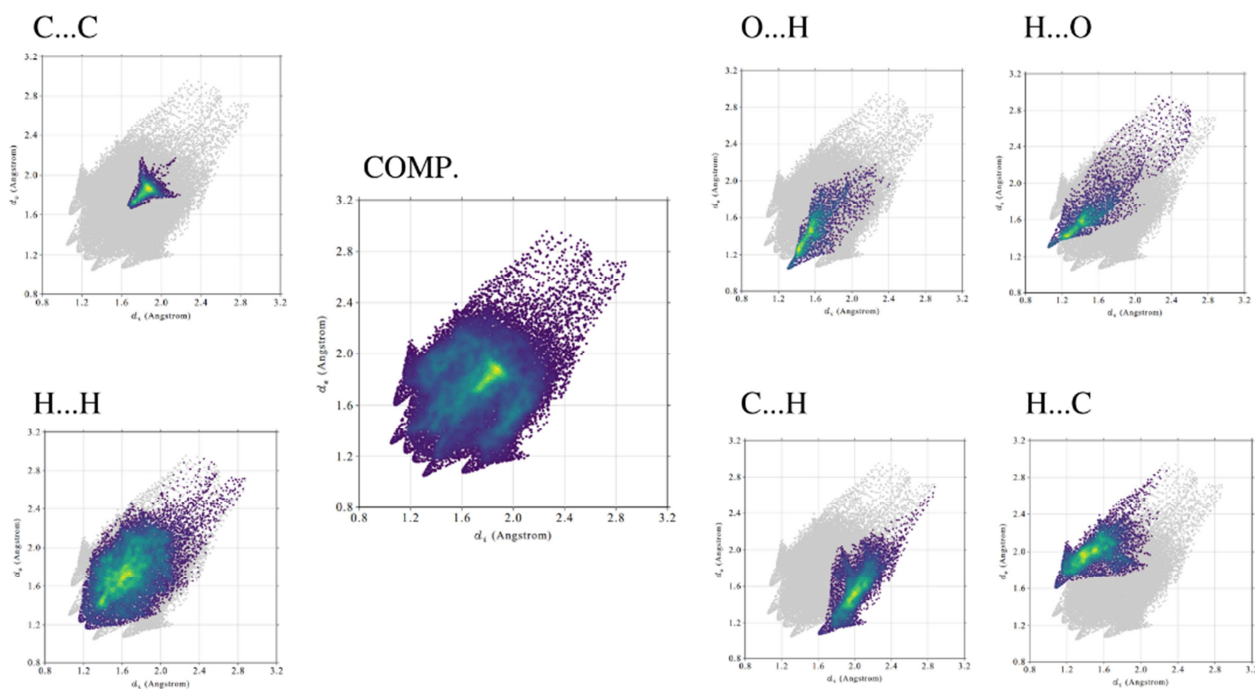

**Figure S3.** Combined QTAIM and NCI results for all of the studied Schiff bases in PCM: molecular structure with ball and stick visualization (a) and only stick visualization for clarity of BCPs and RCPs as well as other intramolecular interactions identified by NCI index (b).

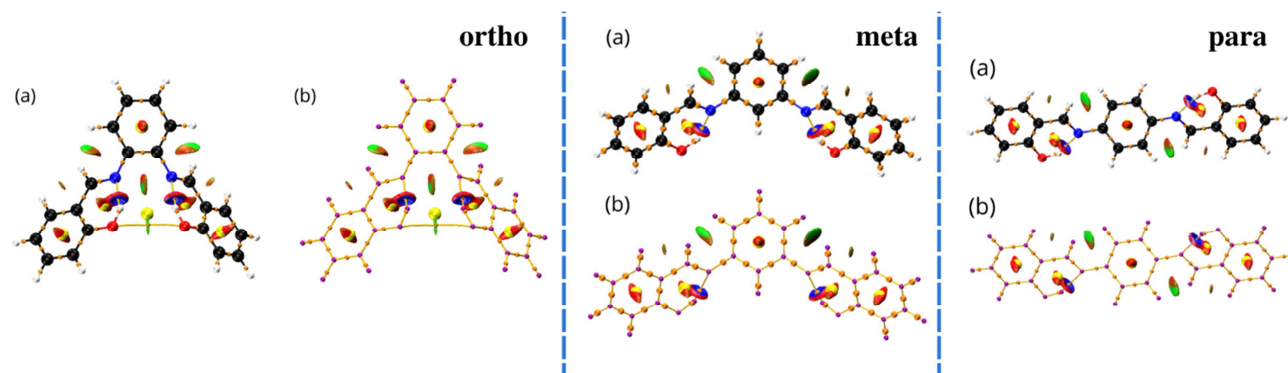

**Figure S4.** NCI scatter graphs for all of the compounds in PCM: ortho (left), meta (middle) and para (right).

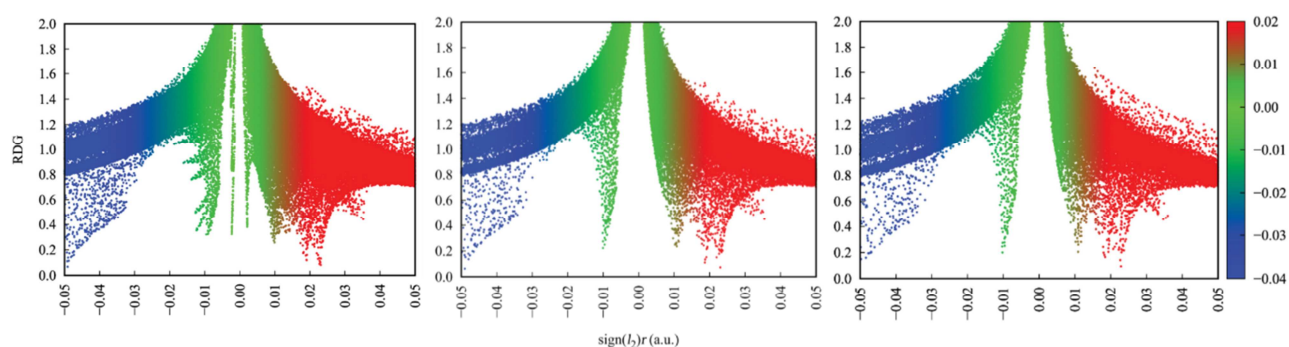

**Table S1.** Electron density,  $\rho_{\text{BCP}}$ , is given in  $e \cdot a_0^{-3}$  atomic units and its Laplacian  $\nabla^2 \rho_{\text{BCP}}$ , is in  $e \cdot a_0^{-5}$  units at the BCPs.  $V_{\rho \text{BCP}}$  stands for BCP potential energy density. They are properties derived from QTAIM. The results were obtained using  $\omega \text{B97XD}/6\text{-}311\text{+G}(2\text{d},2\text{p})$  level of theory in PCM.

|                              | Ortho   | Meta    | Para    |
|------------------------------|---------|---------|---------|
| <b>O – H</b>                 |         |         |         |
| $\rho_{\text{BCP}}$          | 0.3415  | 0.3412  | 0.3406  |
| $\nabla^2 \rho_{\text{BCP}}$ | -2.5765 | -2.5744 | -2.5663 |
| $V_{\rho \text{BCP}}$        | -0.7881 | -0.7877 | -0.7862 |
| <b>H ... N</b>               |         |         |         |
| $\rho_{\text{BCP}}$          | 0.0492  | 0.0493  | 0.0499  |
| $\nabla^2 \rho_{\text{BCP}}$ | 0.1106  | 0.1100  | 0.1100  |
| $V_{\rho \text{BCP}}$        | -0.0431 | -0.0432 | -0.0437 |

**Figure S5.** ELF plot for the intramolecular hydrogen bond in the ortho compound in vacuo (left) and in PCM (right).

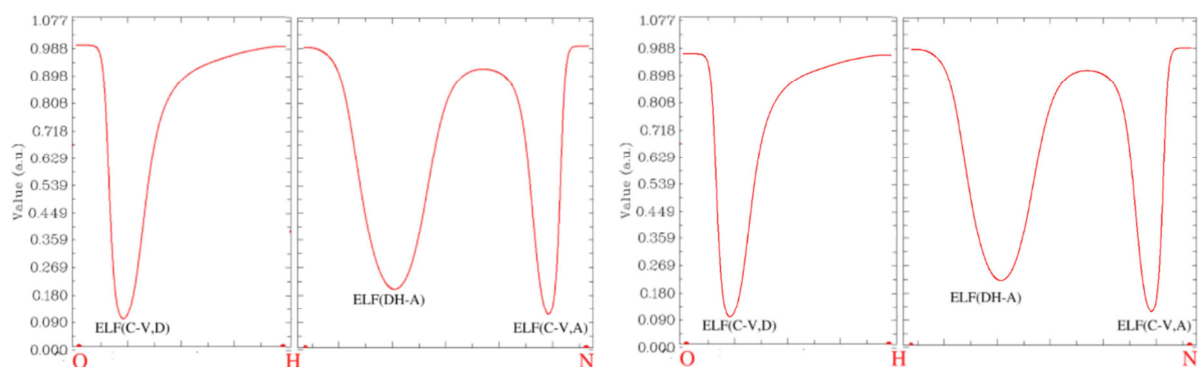

**Figure S6.** ELF plot for the intramolecular hydrogen bond in the meta compound in vacuo (left) and in PCM (right).

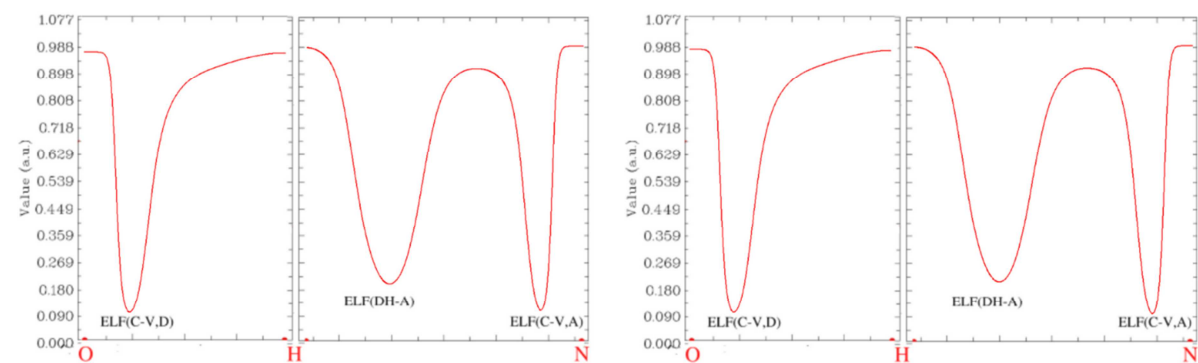

**Figure S7.** ELF plot for the intramolecular hydrogen bond in the para compound in vacuo (left) and in PCM (right).

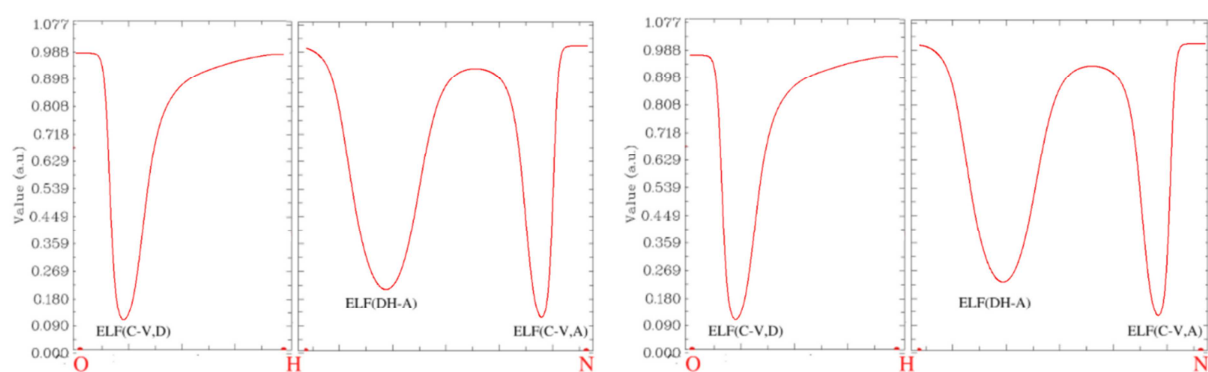

**Table S2.** Core-valence bifurcation point values and CVB indexes for all of the compounds in PCM.

|            | Ortho   | Meta    | Para    |
|------------|---------|---------|---------|
| ELF(C-V,D) | 0.1027  | 0.1029  | 0.1030  |
| ELF(C-V,A) | 0.1177  | 0.1176  | 0.1178  |
| ELF(DH-A)  | 0.2224  | 0.2239  | 0.2275  |
| CVB index  | -0.1197 | -0.1210 | -0.1245 |
